# Supplementary material
Source: MDPI journal article supplement (https://www.mdpi.com/2071-1050/12/11/4702)

## Supplementary Material

**Table S1.** Criteria for calculation of the weighting factor (f) for each household by GfK SE.

|                                                         |                                    |
|---------------------------------------------------------|------------------------------------|
| <b>Geographical region</b>                              | North                              |
|                                                         | North Rhine-Westphalia             |
|                                                         | Center                             |
|                                                         | Baden-Wurttemberg                  |
|                                                         | Bavaria                            |
| <b>Age of head of household</b>                         | East                               |
|                                                         | <40 years                          |
|                                                         | 40–59 years                        |
|                                                         | 60+ years                          |
| <b>Household size</b>                                   | 1 person                           |
|                                                         | 2 persons                          |
|                                                         | 3 + persons                        |
| <b>Size of municipality<br/>(number of inhabitants)</b> | 0–19,999                           |
|                                                         | 20,000–99,999                      |
|                                                         | 100,000–499,999                    |
|                                                         | 500,000 +                          |
| <b>Social status</b>                                    | upper and middle classes (OM + MM) |
|                                                         | lower middle class (UM)            |
|                                                         | upper lower class (OU)             |
|                                                         | lower classes (UU + SD)            |

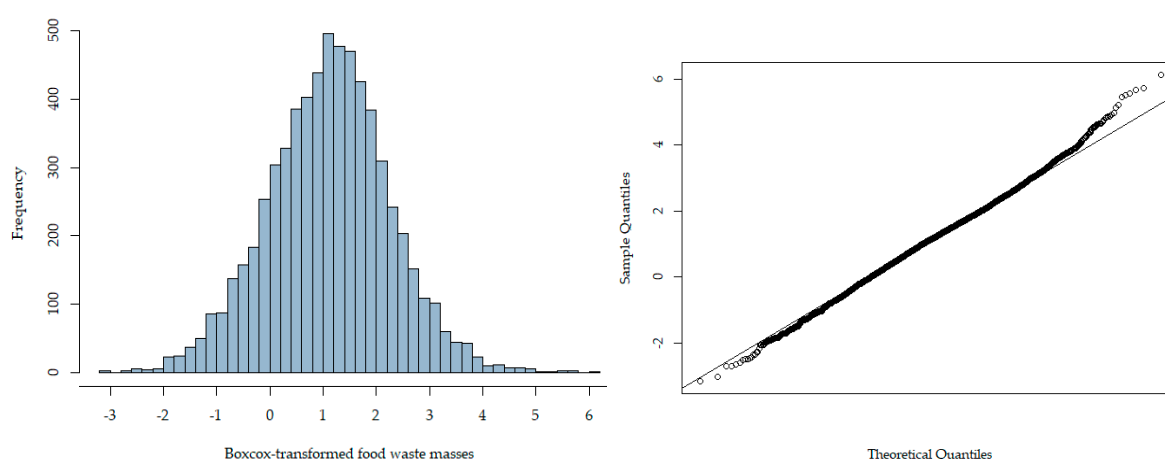

**Figure S1.** Histogram (left) and QQ-Plot (right) showing the normal distribution of transformed data on food waste masses by use of Box-Cox-transformation.

**Table S2.** Underlying data of descriptive statistics concerning edibility, food product types, condition of disposal and disposal routes in percentages and absolute annual numbers (absolute numbers are extrapolated to the whole population of Germany).

|                                     | share of food waste<br>[%] | mass of food waste<br>[1000 t] |
|-------------------------------------|----------------------------|--------------------------------|
| <b><u>potential edibility</u></b>   |                            |                                |
| edible food waste                   | 43.8                       | 1618.8                         |
| inedible food waste                 | 56.2                       | 2077.7                         |
| total                               | 100                        | 3696.4                         |
| <b><u>food products</u></b>         |                            |                                |
| fresh fruit                         | 17.1                       | 276.6                          |
| fresh vegetables                    | 17.1                       | 276.3                          |
| cooked/prepared                     | 16.2                       | 262.9                          |
| bread/baked goods                   | 13.8                       | 224.1                          |
| beverages                           | 10.6                       | 170.9                          |
| dairy products                      | 9.4                        | 152.5                          |
| convenience products/canned food    | 6.7                        | 109.2                          |
| meat, sausages, fish, eggs          | 3.7                        | 60.5                           |
| other food                          | 5.3                        | 85.7                           |
| <b><u>condition at disposal</u></b> |                            |                                |
| loose/open                          | 53.7                       | 868.6                          |
| prepared/cooked                     | 21.2                       | 342.7                          |
| opened packaging                    | 12.9                       | 208.9                          |
| unopened packaging                  | 5.7                        | 92.9                           |
| other                               | 6.5                        | 105.6                          |
| <b><u>disposal route</u></b>        |                            |                                |
| organic waste                       | 33.9                       | 549.3                          |
| residual waste                      | 33.4                       | 539.9                          |
| toilet/sewer                        | 14.1                       | 228.9                          |
| compost                             | 9.1                        | 147.9                          |
| animal feed                         | 6.2                        | 101.1                          |
| other                               | 3.2                        | 51.7                           |

**Table S3.** Underlying data of descriptive statistics concerning disposal reasons by product group, household size group and lifecycle group in percentages and absolute annual numbers (absolute numbers are extrapolated to the whole population of Germany).

| disposal reason/<br>group                                                         | quantity-problem at<br>purchase [1000 t] | quantity-problem<br>at purchase [%] | quantity-problem<br>at home [1000 t] | quantity-problem<br>at home [%] |
|-----------------------------------------------------------------------------------|------------------------------------------|-------------------------------------|--------------------------------------|---------------------------------|
| <b>product group</b>                                                              |                                          |                                     |                                      |                                 |
| fresh fruit                                                                       | 25.1                                     | 9.3                                 | 3.1                                  | 1.1                             |
| fresh vegetables                                                                  | 38.3                                     | 14.3                                | 32.4                                 | 12.1                            |
| meat, sausages,<br>fish, eggs                                                     | 8.2                                      | 14.5                                | 9.5                                  | 16.9                            |
| dairy products                                                                    | 20.4                                     | 13.8                                | 5.0                                  | 3.4                             |
| bread and baked<br>goods                                                          | 34.2                                     | 15.9                                | 19.4                                 | 9.0                             |
| ready-made,<br>convenience                                                        | 10.9                                     | 25.1                                | 7.5                                  | 17.2                            |
| cooked/prepared<br>food                                                           | 10.3                                     | 4.2                                 | 178.5                                | 72.3                            |
| drinks                                                                            | 16.2                                     | 10.4                                | 70.8                                 | 45.5                            |
| other food<br>products                                                            | 29.8                                     | 22.8                                | 19.1                                 | 14.7                            |
| <b>household size<br/>group</b>                                                   |                                          |                                     |                                      |                                 |
| 1 person hh                                                                       | 78.3                                     | 15.8                                | 77.0                                 | 15.5                            |
| 2 person hh                                                                       | 55.3                                     | 11.2                                | 97.3                                 | 19.7                            |
| 3 + person hh                                                                     | 59.8                                     | 9.5                                 | 171.0                                | 27.2                            |
| <b>lifecycle group</b>                                                            |                                          |                                     |                                      |                                 |
| younger singles,<br>couples and<br>families without<br>children                   | 44.3                                     | 13.4                                | 53.9                                 | 16.3                            |
| young families<br>with small and<br>school children                               | 24.7                                     | 8.1                                 | 91.6                                 | 29.8                            |
| families with<br>adolescent<br>children and older<br>families without<br>children | 21.0                                     | 8.8                                 | 53.0                                 | 22.2                            |
| medium aged and<br>older<br>families without<br>children                          | 64.4                                     | 12.8                                | 110.5                                | 21.6                            |
| older singles                                                                     | 38.9                                     | 16.2                                | 36.3                                 | 15.1                            |

| disposal reason/<br>group                                                         | durability [1000 t] | durability [%] | other reason/<br>no spec.<br>[1000 t] | other reason/<br>no spec. [%] |
|-----------------------------------------------------------------------------------|---------------------|----------------|---------------------------------------|-------------------------------|
| <b>product group</b>                                                              |                     |                |                                       |                               |
| fresh fruit                                                                       | 230.2               | 85.6           | 18.2                                  | 3.9                           |
| fresh vegetables                                                                  | 180.0               | 67.5           | 25.6                                  | 6.1                           |
| meat, sausages,<br>fish, eggs                                                     | 36.1                | 64.2           | 6.8                                   | 4.5                           |
| dairy products                                                                    | 118.5               | 80.2           | 8.5                                   | 2.6                           |
| bread and baked<br>goods                                                          | 156.3               | 72.7           | 14.2                                  | 2.3                           |
| ready-made,<br>convenience                                                        | 23.6                | 54.2           | 11.4                                  | 3.6                           |
| cooked/prepared<br>food                                                           | 50.7                | 20.5           | 23.4                                  | 3.1                           |
| drinks                                                                            | 60.4                | 38.8           | 23.6                                  | 5.2                           |
| other food<br>products                                                            | 77.0                | 59.1           | 15.7                                  | 3.4                           |
| <b>household size<br/>group</b>                                                   |                     |                |                                       |                               |
| 1 person hh                                                                       | 289.5               | 58.4           | 50.8                                  | 10.3                          |
| 2 person hh                                                                       | 291.9               | 59.2           | 49.0                                  | 9.9                           |
| 3 + person hh                                                                     | 351.3               | 55.8           | 47.6                                  | 7.6                           |
| <b>lifecycle group</b>                                                            |                     |                |                                       |                               |
| younger singles,<br>couples and<br>families without<br>children                   | 202.0               | 61.1           | 30.4                                  | 9.2                           |
| young families<br>with small and<br>school children                               | 165.2               | 53.8           | 25.3                                  | 8.3                           |
| families with<br>adolescent<br>children and older<br>families without<br>children | 147.0               | 61.7           | 17.4                                  | 7.3                           |
| medium aged and<br>older<br>families without<br>children                          | 280.7               | 55.8           | 47.6                                  | 9.8                           |
| older singles                                                                     | 138.0               | 57.5           | 26.7                                  | 11.2                          |

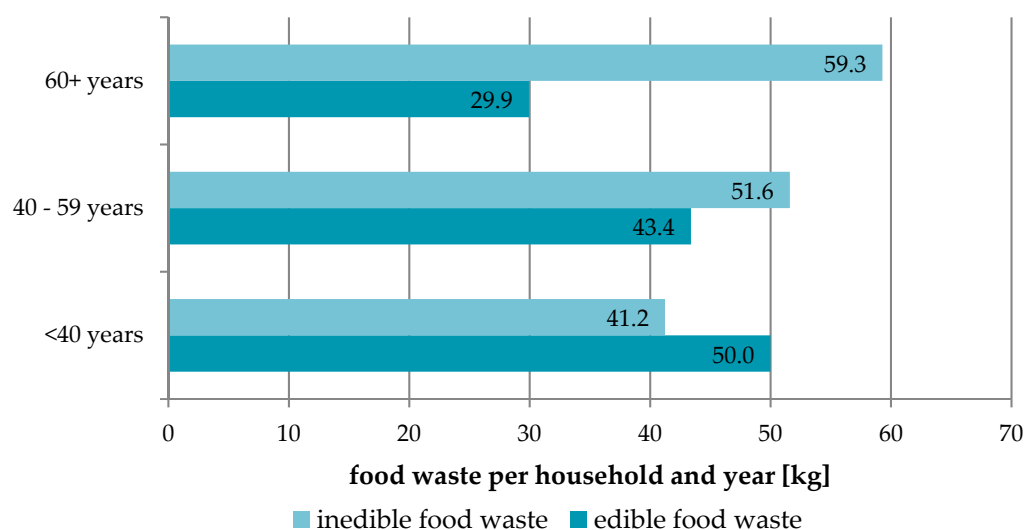

**Figure S2.** Total amount of edible and inedible food waste by age group of head of household per household and year [kg].

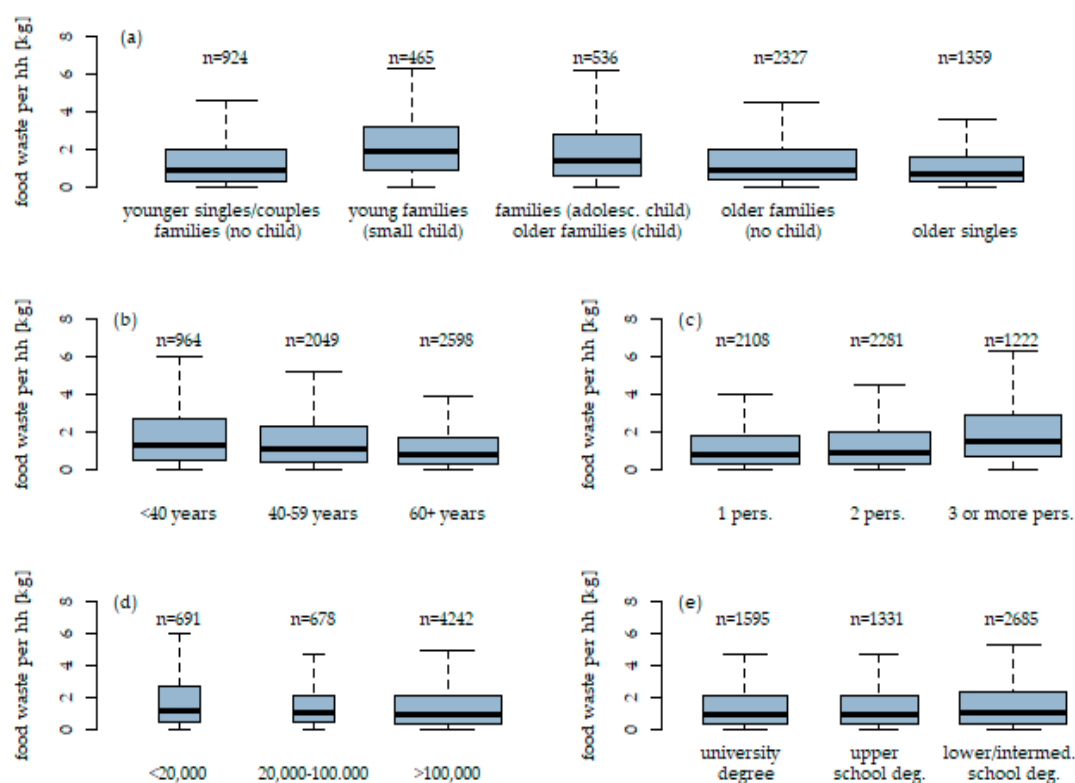

**Figure S3.** Total amount of household (hh) edible food waste only (in contrast to Figure 5 addressing total food waste) within 14 days per (a) household lifecycle stage, (b) age of the head of the household, (c) household size, (d) size category of municipality, and (e) level of education (n indicates sample sizes; outliers are excluded).

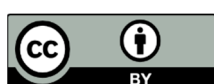

Supplement: s1 [file s1]
